# Supplementary material for: Biotic factors dominantly determine soil inorganic carbon stock across Tibetan alpine grasslands
Source: Copernicus journal article supplement (doi:10.5194/soil-8-687-2022), 2022-10-28
Supplement: Supplementary file 1 [file soil-8-687-2022-supplement.zip]

## Supplementary materials

### Biotic factors dominantly determine soil inorganic carbon stock across Tibetan alpine grasslands

Junxiao Pan <sup>a</sup>, Jinsong Wang <sup>a,\*</sup>, Dashuan Tian <sup>a</sup>, Ruiyang Zhang <sup>a</sup>, Yang Li <sup>a</sup>, Lei Song <sup>a,b</sup>, Jiaming Yang <sup>a</sup>, Chunxue Wei <sup>a</sup>, Shuli Niu <sup>a,b,\*</sup>

<sup>a</sup> Key Laboratory of Ecosystem Network Observation and Modeling, Institute of Geographic Sciences and Natural Resources Research, Chinese Academy of Sciences, Beijing 100101, PR China

<sup>b</sup> College of Resources and Environment, University of Chinese Academy of Sciences, Beijing 100049, PR China

\*Corresponding author at: Key Laboratory of Ecosystem Network Observation and Modeling, Institute of Geographic Sciences and Natural Resources Research, Chinese Academy of Sciences, Beijing 100101, PR China.

E-mail address: wangjinsong@igsnrr.ac.cn (J. Wang), sniu@igsnrr.ac.cn (S. Niu). **Table S1.** The information of sampling sites includes location, grassland type, climatic and plant parameters.

| Sites | Sampling date | Latitude (N) | Longitude (E) | Grassland types | MAP (mm) | MAT (°C) | Altitude (m) | PAB (g m <sup>-2</sup> ) | PC (%) |
|-------|---------------|--------------|---------------|-----------------|----------|----------|--------------|--------------------------|--------|
| 1     | 8/16/20       | 32 °43'09"   | 79 °49'39"    | AD              | 72       | -2.93    | 4735         | 22.1                     | 10.8   |
| 2     | 8/15/20       | 32 °23'13"   | 80 °38'34"    | AD              | 88       | -2.48    | 4772         | 22.0                     | 11.5   |
| 3     | 8/14/20       | 32 °10'05"   | 81 °36'12"    | AD              | 96       | -3.90    | 5016         | 9.5                      | 10.8   |
| 4     | 8/13/20       | 32 °15'29"   | 82 °20'47"    | AD              | 85       | 0.52     | 4465         | 11.4                     | 11.5   |

|      |         |            |             |    |     |       |      |       |      |
|------|---------|------------|-------------|----|-----|-------|------|-------|------|
| 5    | 8/11/20 | 32 °23'06" | 82 °56'25"  | AD | 74  | 0.59  | 4459 | 12.7  | 14.0 |
| 6    | 8/10/20 | 32 °18'19" | 83 °45'36"  | AD | 79  | 1.21  | 4379 | 53.3  | 17.3 |
| 7    | 8/9/20  | 31 °57'38" | 85 °05'53"  | AS | 112 | 0.35  | 4606 | 19.4  | 18.5 |
| 8    | 8/6/20  | 31 °54'10" | 86 °15'32"  | AS | 157 | -0.17 | 4742 | 8.8   | 18.3 |
| 9    | 8/5/20  | 31 °56'59" | 86 °40'27"  | AS | 193 | 1.22  | 4554 | 8.5   | 10.5 |
| 10   | 8/4/20  | 31 °49'55" | 87 °38'42"  | AS | 292 | 1.82  | 4510 | 27.1  | 15.8 |
| 11   | 8/3/20  | 31 °50'22" | 88 °20'44"  | AS | 366 | 1.20  | 4591 | 11.8  | 9.5  |
| 12   | 7/30/20 | 31 °37'59" | 89 °24'13"  | AS | 443 | 0.80  | 4649 | 63.1  | 28.8 |
| 13   | 8/22/20 | 31 °23'24" | 90 °13'48"  | AS | 457 | 0.24  | 4629 | 56.9  | 34.3 |
| 14   | 8/22/20 | 31 °23'24" | 90 °46'48"  | AS | 453 | 0.03  | 4545 | 20.8  | 51.8 |
| 15   | 8/22/20 | 31 °31'48" | 91 °22'48"  | AM | 454 | -0.21 | 4610 | 46.5  | 36.8 |
| 16   | 8/23/20 | 31 °38'40" | 92 °19'19"  | AM | 483 | -0.71 | 4480 | 144.0 | 85.0 |
| 17   | 8/23/20 | 31 °50'52" | 92 °55'54"  | AM | 539 | 0.56  | 4312 | 146.2 | 89.0 |
| 18   | 8/24/20 | 31 °47'06" | 94 °29'44"  | AM | 636 | -0.28 | 4084 | 105.8 | 92.8 |
| 19   | 8/24/20 | 31 °32'28" | 95 °15'20"  | AM | 607 | 2.41  | 3928 | 82.2  | 82.8 |
| 20   | 8/25/20 | 31 °06'37" | 96 °16'21"  | AM | 600 | -0.07 | 4197 | 49.9  | 97.0 |
| 21   | 8/25/20 | 31 °07'13" | 96 °44'24"  | AM | 577 | 2.11  | 3777 | 190.7 | 96.8 |
| 22   | 8/27/20 | 31 °19'26" | 97 °39'16"  | AM | 579 | -0.11 | 4172 | 130.3 | 99.5 |
| 23   | 8/27/20 | 31 °57'13" | 98 °51'60"  | AM | 631 | -2.54 | 4103 | 241.6 | 94.0 |
| 24   | 8/28/20 | 31 °38'43" | 100 °15'33" | AM | 648 | 5.76  | 3544 | 157.4 | 94.8 |
| 25   | 8/28/20 | 32 °23'04" | 102 °25'31" | AM | 706 | 2.43  | 3500 | 214.9 | 94.8 |
| Mean |         |            |             |    | 377 | 0.31  | 4374 | 74.3  | 49.0 |

---

AM, alpine meadow; AS, alpine steppe; AD, alpine desert.

**Table S2.** The abbreviations of variables in this study.

| Variables                 | Abbreviations | Category         | Factors        |
|---------------------------|---------------|------------------|----------------|
| Soil inorganic carbon     | SIC           | -                | -              |
| Mean annual precipitation | MAP           | Climatic factor  | Abiotic factor |
| Mean annual temperature   | MAT           | Climatic factor  | Abiotic factor |
| Altitude                  | -             | Climatic factor  | Abiotic factor |
| Plant aboveground biomass | PAB           | Plant factor     | Biotic factor  |
| Plant coverage            | PC            | Plant factor     | Biotic factor  |
| Root biomass              | RB            | Plant factor     | Biotic factor  |
| pH                        | -             | Edaphic factor   | Abiotic factor |
| Soil available nitrogen   | AN            | Edaphic factor   | Abiotic factor |
| Sand proportion           | SP            | Edaphic factor   | Abiotic factor |
| Microbial biomass carbon  | MBC           | Microbial factor | Biotic factor  |
| Bacterial gene abundance  | BA            | Microbial factor | Biotic factor  |
| Fungal gene abundance     | FA            | Microbial factor | Biotic factor  |

**Table S3** Pearson correlation coefficients between SIC density and explanatory variables. \* and \*\* indicate significance at  $p < 0.05$  and 0.01 (n=25), respectively.

| Parameter | MAP     | MAT   | Altitude | PAB     | PC      | RB     | pH     | AN      | SP     | MBC    | BA     | FA      |
|-----------|---------|-------|----------|---------|---------|--------|--------|---------|--------|--------|--------|---------|
| Topsoil   | -0.59** | 0.07  | 0.43*    | -0.56** | -0.67** | -0.41* | 0.70** | -0.56** | 0.54** | -0.43* | -0.50* | -0.52** |
| Subsoil   | -0.64** | -0.03 | 0.39     | -0.55** | -0.66** | -0.28  | 0.61** | -0.52** | 0.50*  | 0.02   | -0.43  | -0.48   |
