# Supplementary material for: Biotic factors dominantly determine soil inorganic carbon stock across Tibetan alpine grasslands
Source: Copernicus journal article supplement (doi:10.5194/soil-8-687-2022), 2022-10-28
Supplement: Supplementary file 2 [file soil-8-687-2022-supplement.zip]

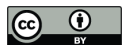

## *Supplement of*

# **Biotic factors dominantly determine soil inorganic carbon stock across Tibetan alpine grasslands**

**Junxiao Pan et al.**

*Correspondence to:* Jinsong Wang ([wangjinsong@igsnrr.ac.cn](mailto:wangjinsong@igsnrr.ac.cn)) and Shuli Niu ([sniu@igsnrr.ac.cn](mailto:sniu@igsnrr.ac.cn))

- [soil-8-687-2022-supplement-title-page.pdf](#)
- SI
  - [DATA-soil.csv](#)
  - [Supplement materials.pdf](#)

The copyright of individual parts of the supplement might differ from the article licence.
